# Supplementary material
Source: PubMed Central journal article supplement (PMC4243068)
Supplement: peds.2014-0886_peds.2014-0886SupplementaryData.pdf [file peds.2014-0886_peds.2014-0886SupplementaryData.pdf]

## Supplemental Information

Q:1 **SUPPLEMENTAL TABLE 3** Characteristics of the 39 Infants With Congenital HHV-6 Infection

| Subject ID | HHV-6 Variant | CHI or TP | Bayley-MDI | Birth Weight (kg) | Gestational Age (mo) |
|------------|---------------|-----------|------------|-------------------|----------------------|
| 4          | B             | CHI       | 96         | 2.9               | 38                   |
| 16         | B             | CHI       | 94         | 3.7               | 40                   |
| 18         | B             | CHI       | 106        | 3.2               | 40                   |
| 21         | B             | TP        | 99         | 3.7               | 40                   |
| 23         | B             | CHI       | 105        | 3.2               | 39                   |
| 32         | A             | CHI       | 116        | 3.2               | 38                   |
| 33         | B             | NA        | 97         | 3.8               | 40                   |
| 38         | B             | CHI       | 109        | 3.4               | 40                   |
| 59         | B             | CHI       | 116        | 3.8               | 39                   |
| 61         | A             | CHI       | 107        | 3.6               | 39                   |
| 66         | B             | CHI       | 103        | 3.4               | 37                   |
| 72         | B             | CHI       | 95         | 3.7               | 38                   |
| 97         | A             | NA        | 95         | 3.3               | 41                   |
| 99         | B             | CHI       | 101        | 3.5               | 40                   |
| 120        | A             | CHI       | 100        | 3.5               | 40                   |
| 171        | B             | CHI       | 113        | 3.7               | 42                   |
| 176        | B             | CHI       | 103        | 3.4               | 38                   |
| 178        | B             | CHI       | 91         | 4.0               | 40                   |
| 179        | B             | CHI       | 107        | 3.7               | 39                   |
| 189        | A             | CHI       | 88         | 3.6               | 42                   |
| 197        | B             | CHI       | 103        | 3.9               | 39                   |
| 198        | A             | CHI       | 116        | 4.4               | 40                   |
| 201        | B             | CHI       | 98         | 3.9               | 39                   |
| 204        | A             | CHI       | 86         | 3.3               | 38                   |
| 205        | A             | CHI       | 97         | 3.2               | 39                   |
| 214        | B             | CHI       | 94         | 3.5               | 40                   |
| 225        | B             | CHI       | 114        | 3.4               | 41                   |
| 240        | A             | CHI       | 105        | 3.6               | 40                   |
| 264        | B             | CHI       | 122        | 3.7               | 42                   |
| 266        | B             | CHI       | 101        | 4.1               | 40                   |
| 278        | B             | TP        | 111        | 3.9               | 41                   |
| 281        | B             | CHI       | 107        | 3.9               | 40                   |
| 282        | B             | CHI       | 86         | 4.3               | 39                   |
| 292        | B             | CHI       | 112        | 3.6               | 39                   |
| 293        | A             | TP        | 105        | 3.8               | 40                   |
| 295        | B             | TP        | 114        | 3.5               | 40                   |
| 297        | A             | TP        | 116        | 3.3               | 40                   |
| 298        | B             | CHI       | 103        | 3.7               | 39                   |
| 299        | A             | CHI       | 102        | 2.9               | 40                   |

CHI, chromosomal integration; ID, identifier; NA, not available; TP, transplacental infection.

**SUPPLEMENTAL TABLE 4** Characteristics of the 63 Matched Control Infants

| Subject ID | Bayley-MDI | Birth Weight (kg) | Gestational Age (mo) |
|------------|------------|-------------------|----------------------|
| 5          | 107        | 3.2               | 38                   |
| 6          | 110        | 3.6               | 40                   |
| 9          | 83         | 3.7               | 37                   |
| 11         | 114        | 3.2               | 40                   |
| 17         | 103        | 3.4               | 40                   |
| 19         | 85         | 3.7               | 39                   |
| 20         | 104        | 3.4               | 37                   |
| 24         | 97         | 2.8               | 39                   |
| 26         | 111        | 2.8               | 41                   |
| 28         | 112        | 3.3               | 40                   |
| 34         | 103        | 3.1               | 40                   |
| 35         | 103        | 3.9               | 40                   |
| 36         | 61         | 4.6               | 38                   |
| 37         | 113        | 3.8               | 40                   |
| 39         | 108        | 3.5               | 39                   |
| 42         | 103        | 3                 | 37                   |
| 43         | 99         | 3.6               | 40                   |
| 44         | 112        | 3.6               | 39                   |
| 45         | 119        | 4.1               | 42                   |
| 46         | 99         | 2.94              | 38                   |
| 48         | 101        | 2.9               | 37                   |
| 49         | 92         | 2.6               | 37                   |
| 53         | 108        | 3.8               | 41                   |
| 55         | 108        | 1.7               | 37                   |
| 56         | 116        | 3.7               | 41                   |
| 57         | 89         | 3.4               | 38                   |
| 60         | 101        | 3.9               | 39                   |
| 63         | 101        | 2.8               | 39                   |
| 64         | 124        | 3.7               | 39                   |
| 65         | 80         | 3.6               | 39                   |
| 68         | 84         | 3.2               | 38                   |
| 69         | 109        | 3.7               | 40                   |
| 71         | 103        | 2.3               | 37                   |
| 73         | 77         | 3.4               | 39                   |
| 74         | 108        | 3.5               | 40                   |
| 75         | 109        | 4.4               | 41                   |
| 77         | 115        | 4                 | 39                   |
| 78         | 107        | 3.2               | 39                   |
| 81         | 90         | 3.2               | 39                   |
| 82         | 115        | 3.2               | 39                   |
| 84         | 116        | 3.6               | 40                   |
| 87         | 105        | 3.1               | 38                   |
| 88         | 116        | 3.8               | 38                   |
| 89         | 116        | 3.9               | 39                   |
| 90         | 109        | 4.4               | 40                   |
| 91         | 103        | 3.1               | 39                   |
| 92         | 116        | 3.6               | 39                   |
| 93         | 122        | 4.3               | 40                   |
| 94         | 107        | 4.1               | 41                   |
| 95         | 114        | 3.3               | 39                   |
| 98         | 109        | 4                 | 41                   |
| 107        | 114        | 3.2               | 39                   |
| 113        | 116        | 3.7               | 40                   |
| 125        | 119        | 2.8               | 42                   |
| 129        | 124        | 3.7               | 40                   |
| 138        | 118        | 4.1               | 40                   |
| 146        | 126        | 3.5               | 39                   |
| 155        | 99         | 3.2               | 37                   |
| 202        | 102        | 3.4               | 41                   |
| 259        | 89         | 3.7               | 39                   |
| 273        | 118        | 3.2               | 40                   |
| 276        | 96         | 3.6               | 39                   |
| 286        | 102        | 4                 | 39                   |

ID, identifier.
